# Supplementary material
Source: HighWire-hosted journal article supplement (https://bmjopen.bmj.com/content/12/4/e057194)
Supplement: inline-supplementary-material-1 [file inline-supplementary-material-1.pdf]

## Supplemental File 1: Database search strategy

| <b>Database: AMED</b> |                                                                                                                                                                                                                                                                                                                                                                                             |
|-----------------------|---------------------------------------------------------------------------------------------------------------------------------------------------------------------------------------------------------------------------------------------------------------------------------------------------------------------------------------------------------------------------------------------|
| <b>Domain</b>         | <b>Search terms</b>                                                                                                                                                                                                                                                                                                                                                                         |
| Palliative population | 1. exp Palliative Care/<br>2. palliative care.tw<br>3. exp Terminal Care/<br>4. (terminal* adj2 care).tw<br>5. hospices/<br>6. hospice care.tw<br>7. end stage.tw<br>8. late stage.tw<br>9. (advanced adj2 disease*).tw<br>10. (advanced adj2 illness*).tw<br>11. terminal* ill*.tw<br>12. end of life.tw<br>13. exp Advance directive/<br>14. advance* directive*.tw<br><b>15. OR 1-14</b> |
| MDT                   | 16. multidisciplin*.tw<br>17. MDT.tw<br>18. interdisciplin*.tw<br>19. exp patient care team/<br>20. exp "delivery of health care"/<br>21. exp interprofessional/<br>22. interprofessional.tw<br>23. team*.tw<br><b>24. OR 16-23</b><br><b>25. 15 AND 24</b>                                                                                                                                 |
| Decision Making       | 26. exp decision making/<br>27. decision*.tw<br>28. decid*.tw<br>29. exp communication/<br>30. collaborat*.tw<br><b>31. OR 26-30</b><br><b>32. 25 AND 31</b>                                                                                                                                                                                                                                |
| Prognosis             | 33. exp prognosis/<br>34. prognos*.tw<br>35. surviv*.tw<br>36. predict*.tw<br>37. mortality/<br>38. dying.tw<br><b>39. OR 33-38</b><br><b>40. 15 AND 25 AND 32 AND 39</b>                                                                                                                                                                                                                   |
| Limits                | English language                                                                                                                                                                                                                                                                                                                                                                            |

**Database:** CINAHL

| <b>Domain</b>         | <b>Search terms</b>                                                                                                                                                                                                                                                                                                                                                                                                                                                                                                                                                                                                                                                                                                                    |
|-----------------------|----------------------------------------------------------------------------------------------------------------------------------------------------------------------------------------------------------------------------------------------------------------------------------------------------------------------------------------------------------------------------------------------------------------------------------------------------------------------------------------------------------------------------------------------------------------------------------------------------------------------------------------------------------------------------------------------------------------------------------------|
| Palliative population | <ol style="list-style-type: none"> <li>1. MH "palliative care+"</li> <li>2. TI "palliative care" OR AB "palliative care"</li> <li>3. MH "terminal care+"</li> <li>4. TI terminal* N2 care OR AB terminal* N2 care</li> <li>5. MH "hospices"</li> <li>6. TI "hospice care" OR AB "hospice care"</li> <li>7. TI "end stage" OR AB "end stage"</li> <li>8. TI "late stage" OR AB "late stage"</li> <li>9. TI advanced N2 disease OR AB advanced N2 disease</li> <li>10. TI advanced N2 illness OR AB advanced N2 illness</li> <li>11. TI terminal* ill* OR AB terminal* ill*</li> <li>12. TI end of life OR AB end of life</li> <li>13. MH "advance directives+"</li> <li>14. TI advance* directive* OR AB advance* directive*</li> </ol> |
| MDT                   | <ol style="list-style-type: none"> <li>15. <b>OR 1-14</b></li> <li>16. MH "multidisciplinary care team+"</li> <li>17. TI multidisciplin* OR AB multidisciplin*</li> <li>18. TI MDT OR AB MDT</li> <li>19. TI interdisciplin* OR AB interdisciplin*</li> <li>20. MH "Patient Care Conferences+"</li> <li>21. MH "interprofessional relations+"</li> <li>22. TI interprofessional OR AB interprofessional</li> <li>23. TI team* OR AB team*</li> </ol>                                                                                                                                                                                                                                                                                   |
| Decision making       | <ol style="list-style-type: none"> <li>24. <b>OR 16-23</b></li> <li>25. <b>15 AND 24</b></li> <li>26. MH "decision making+"</li> <li>27. TI decision* OR AB decision*</li> <li>28. TI decid* OR AB decid*</li> <li>29. MH "decision making, clinical+"</li> <li>30. MH "communication+"</li> <li>31. TI collaborat* OR AB collaborat*</li> </ol>                                                                                                                                                                                                                                                                                                                                                                                       |
| Prognosis             | <ol style="list-style-type: none"> <li>32. <b>OR 26-31</b></li> <li>33. <b>25 AND 32</b></li> <li>34. MH "prognosis+"</li> <li>35. TI prognos* OR AB prognos*</li> <li>36. TI surviv* OR AB surviv*</li> <li>37. TI predict* OR AB predict*</li> <li>38. MH "mortality"</li> <li>39. TI dying OR AB dying</li> </ol>                                                                                                                                                                                                                                                                                                                                                                                                                   |
| Limits                | <ol style="list-style-type: none"> <li>40. <b>OR 34-38</b></li> <li>41. <b>33 AND 39</b></li> <li>Language: English</li> </ol>                                                                                                                                                                                                                                                                                                                                                                                                                                                                                                                                                                                                         |

**Database: EMBASE**

| <b>Domain</b>         | <b>Search terms</b>                                                                                                                                                                                                                                                                                                                                                                         |
|-----------------------|---------------------------------------------------------------------------------------------------------------------------------------------------------------------------------------------------------------------------------------------------------------------------------------------------------------------------------------------------------------------------------------------|
| Palliative population | 1. exp Palliative Care/<br>2. palliative care.tw<br>3. exp Terminal Care/<br>4. (terminal* adj2 care).tw<br>5. hospices/<br>6. hospice care.tw<br>7. end stage.tw<br>8. late stage.tw<br>9. (advanced adj2 disease*).tw<br>10. (advanced adj2 illness*).tw<br>11. terminal* ill*.tw<br>12. end of life.tw<br>13. exp Advance directive/<br>14. advance* directive*.tw<br><b>15. OR 1-13</b> |
| MDT                   | 16. exp multidisciplinary team/<br>17. multidisciplin*.tw<br>18. MDT.tw<br>19. interdisciplin*.tw<br>20. exp patient care team/<br>21. exp interprofessional/<br>22. interprofessional.tw<br>23. team*.tw<br><b>24. OR 15-22</b><br><b>25. 14 AND 23</b>                                                                                                                                    |
| Decision Making       | 26. exp decision making/<br>27. decision*.tw<br>28. decid*.tw<br>29. exp clinical decision making/<br>30. exp communication/<br>31. collaborat*.tw<br><b>32. OR 25-30</b><br><b>33. 24 AND 31</b>                                                                                                                                                                                           |
| Prognosis             | 34. exp prognosis/<br>35. prognos*.tw<br>36. surviv*.tw<br>37. predict*.tw<br>38. dying/<br>39. dying.tw<br>40. mortality/<br><b>41. OR 33-39</b><br><b>42. 14 AND 23 AND 31 AND 40</b>                                                                                                                                                                                                     |
| Limits                | English language<br>Humans                                                                                                                                                                                                                                                                                                                                                                  |

**Database: MEDLINE**

| <b>Domain</b>         | <b>Search terms</b>                                                                                                                                                                                                                                                                                                                                                                         |
|-----------------------|---------------------------------------------------------------------------------------------------------------------------------------------------------------------------------------------------------------------------------------------------------------------------------------------------------------------------------------------------------------------------------------------|
| Palliative population | 1. exp Palliative Care/<br>2. palliative care.tw<br>3. exp Terminal Care/<br>4. (terminal* adj2 care).tw<br>5. hospices/<br>6. hospice care.tw<br>7. end stage.tw<br>8. late stage.tw<br>9. (advanced adj2 disease*).tw<br>10. (advanced adj2 illness*).tw<br>11. terminal* ill*.tw<br>12. end of life.tw<br>13. exp Advance directive/<br>14. advance* directive*.tw<br><b>15. OR 1-14</b> |
| MDT                   | 16. multidisciplin*<br>17. MDT.tw<br>18. interdisciplin*.tw<br>19. exp patient care team/<br>20. exp interprofessional/<br>21. interprofessional.tw<br>22. team*.tw<br><b>23. OR 16-22</b><br><b>24. 15 AND 24</b>                                                                                                                                                                          |
| Decision-making       | 25. exp decision making/<br>26. decision*.tw<br>27. decid*.tw<br>28. exp clinical decision making/<br>29. exp communication/<br>30. collaborat*.tw<br><b>31. OR 25-30</b><br><b>32. 25 AND 31</b>                                                                                                                                                                                           |
| Prognosis             | 33. exp prognosis/<br>34. prognos*.tw<br>35. surviv*.tw<br>36. predict*.tw<br>37. mortality/<br>38. dying.tw<br><b>39. OR 33-38</b><br><b>40. 15 AND 25 AND 32 AND 39</b>                                                                                                                                                                                                                   |
| Limits                | English language<br>Humans                                                                                                                                                                                                                                                                                                                                                                  |

**Database: PsychINFO**

| <b>Domain</b>         | <b>Search terms</b>                                                                                                                                                                                                                                                                                                                                              |
|-----------------------|------------------------------------------------------------------------------------------------------------------------------------------------------------------------------------------------------------------------------------------------------------------------------------------------------------------------------------------------------------------|
| Palliative population | 1. exp Palliative Care/<br>2. palliative care.tw<br>3. (terminal* adj2 care).tw<br>4. hospice/<br>5. hospice care.tw<br>6. end stage.tw<br>7. late stage.tw<br>8. (advanced adj2 disease*).tw<br>9. (advanced adj2 illness*).tw<br>10. terminal* ill*.tw<br>11. end of life.tw<br>12. exp Advance directive/<br>13. advance* directive*.tw<br><b>14. OR 1-13</b> |
| MDT                   | 15. multidisciplin*<br>16. MDT.tw<br>17. exp Interdisciplinary Treatment Approach/<br>18. interdisciplin*.tw<br>19. exp health care delivery/<br>20. interprofessional.tw<br>21. exp Teams/<br>22. team*.tw<br><b>23. OR 15-22</b><br><b>24. 15 AND 24</b>                                                                                                       |
| Decision Making       | 25. exp decision making/<br>26. decision*.tw<br>27. decid*.tw<br>28. exp clinical judgment (not diagnosis)/<br>29. exp communication/<br>30. collaborat*.tw<br><b>31. OR 25-30</b><br><b>32. 24 AND 31</b>                                                                                                                                                       |
| Prognosis             | 33. exp prognosis/<br>34. prognos*.tw<br>35. surviv*.tw<br>36. predict*.tw<br>37. dying/<br>38. dying.tw<br>39. mortality/<br><b>40. OR 33-39</b><br><b>41. 14 AND 24 AND 32 AND 40</b>                                                                                                                                                                          |
| Limits                | English language<br>Human                                                                                                                                                                                                                                                                                                                                        |

**Database:** Web of Science

| Domain                | Search terms                      |
|-----------------------|-----------------------------------|
| Palliative Population | 1. TS="palliative care"           |
|                       | 2. TS="terminal care"             |
|                       | 3. TS=(terminal* NEAR/2 care)     |
|                       | 4. TS=hospices                    |
|                       | 5. TS="hospice care"              |
|                       | 6. TS="end stage"                 |
|                       | 7. TS="late stage"                |
|                       | 8. TS=(advanced NEAR/2 disease*)  |
|                       | 9. TS=(advanced NEAR/2 illness*)  |
|                       | 10. TS=terminal* ill*             |
|                       | 11. TS="end of life"              |
|                       | 12. TS=advance* directive*        |
|                       | <b>13. OR 1-12</b>                |
| MDT                   | 14. TS="multidisciplinary team"   |
|                       | 15. TS=multidisciplin*            |
|                       | 16. TS=MDT                        |
|                       | 17. TS=interdisciplin*            |
|                       | 18. TS="patient care team"        |
|                       | 19. TS=interprofessional          |
|                       | 20. TS=team*                      |
|                       | <b>21. OR 14-20</b>               |
| Decision Making       | <b>22. 13 AND 21</b>              |
|                       | 23. TS="decision making"          |
|                       | 24. TS=decision*                  |
|                       | 25. TS=decid*                     |
|                       | 26. TS="clinical decision making" |
|                       | 27. TS=communication              |
|                       | 28. TS=collaborat*                |

|           |                                                                                                                                     |
|-----------|-------------------------------------------------------------------------------------------------------------------------------------|
|           | <div>29. <b>OR 23-28</b></div> <div>30. <b>22 AND 29</b></div>                                                                      |
| Prognosis | <div>31. TS=prognos*</div> <div>32. TS=surviv*</div> <div>33. TS=predict*</div> <div>34. TS=dying</div> <div>35. TS=mortality</div> |
|           | <div>36. <b>OR 31-35</b></div> <div>37. <b>30 AND 36</b></div>                                                                      |
| Limits    | <div>38. <b>37 AND LANGUAGE: (English)</b></div>                                                                                    |
